# Supplementary material for: Death by a thousand cuts through kinase inhibitor combinations that maximize selectivity and enable rational multitargeting
Source: eLife. 2023 Dec 4;12:e86189. doi: 10.7554/eLife.86189 (PMC10769483; doi:10.7554/eLife.86189)
Supplement: Figure 4—source data 1. — Kinase targets were assessed using combinations of inhibitors across four individual datasets: PKIS2-645, Davis et al., Klaeger et al., and Karaman et al. The tight penalty distribution and medium penalty distributions were used. Five technical replicates were performed for all analyses. Kinase targets were ranked within each dataset by the total improvement using both penalty distributions. [file elife-86189-fig4-data1.xlsx]

## Sheet: MMS Single Target Analyses
PKIS2-645, Drewry et al (2017)
Rank	Kinase	ΔJSD μ=200	ΔJSD μ=200 std	ΔJSD μ=700	ΔJSD μ=700 std	i=1 score μ=200	i=1 score μ=200 std	i>1 max score μ=200	i>1 max score μ=200 std	i=1 score μ=700	i=1 score μ=700 std	i>1 max score μ=700	i>1 max score μ=700 std
1	PLK3	0.00524	0.000108	0.011419	0.000613	0.981691	0.000129	0.986932	6.3e-05	0.935531	0.000745	0.94695	0.000871
2	p38-alpha	0.004321	7.7e-05	0.009692	0.000194	0.99421	8.9e-05	0.998531	6.3e-05	0.966733	0.000636	0.976424	0.000561
3	RIPK2	0.004702	0.000115	0.005581	0.001279	0.976469	9.2e-05	0.981171	7.7e-05	0.92563	0.000329	0.931211	0.001494
4	PLK2	0.002284	6.9e-05	0.006993	0.000682	0.986013	0.000132	0.988296	8.6e-05	0.94743	0.000931	0.954423	0.000658
5	p38-beta	0.001958	0.000121	0.005125	0.00058	0.991274	0.000183	0.993232	0.000121	0.950566	0.000696	0.955691	0.001124
6	JNK2	0.002646	0.000183	0.002041	0.000229	0.987218	0.000181	0.989864	0.000151	0.969261	0.00051	0.971303	0.000588
7	JNK1	0.002795	9.4e-05	0.001817	0.000894	0.987161	0.000129	0.989957	0.000116	0.969403	0.000338	0.97122	0.000749
8	ACVR1	0.001165	9.7e-05	0.003369	5.2e-05	0.993047	0.000127	0.994212	4.1e-05	0.967785	0.000642	0.971154	0.000596
9	LIMK1	0.001182	7e-05	0.003227	9.4e-05	0.993013	0.000145	0.994195	8.4e-05	0.967591	0.000743	0.970818	0.000824
10	JNK3	0.002667	6.9e-05	0.001686	0.000333	0.987173	0.000111	0.98984	7.8e-05	0.969527	0.000518	0.971212	0.000622
11	ZAK	-0.000603	0.000129	0.004946	0.000554	0.985886	0.000111	0.985283	8.6e-05	0.952018	0.000611	0.956964	0.000704
12	TXK	-0.000686	7.1e-05	0.004969	0.000238	0.985995	9.7e-05	0.985309	7.4e-05	0.951862	0.000644	0.956831	0.000695
13	TESK1	-0.000502	0.00011	0.004192	0.000888	0.986177	0.000211	0.985675	0.000139	0.952573	0.000671	0.956765	0.000939
14	KIT	0.000549	0.000129	0.002786	0.000464	0.977986	0.000131	0.978535	7.5e-05	0.943257	0.000389	0.946044	0.000654
15	LKB1	-0.001214	0.000116	0.004488	0.000806	0.979765	0.000313	0.978551	0.000232	0.929783	0.001614	0.934271	0.000877
16	VRK2	0.003052	0.000365	-2.7e-05	0.000761	0.988382	8.6e-05	0.991434	0.000307	0.95041	0.000823	0.950383	0.000632
17	PIK3CB	0.002273	7e-05	0.000584	0.000747	0.996156	0.000146	0.998429	9.8e-05	0.973236	0.000511	0.973819	0.000777
18	FGFR2	-0.002674	0.00011	0.003735	0.000157	0.981404	0.000165	0.97873	0.000155	0.934192	0.001176	0.937927	0.001254
19	ROCK1	0.001832	0.000172	-0.001848	0.000903	0.989719	0.000117	0.991551	9.9e-05	0.954122	0.000595	0.952274	0.000821
20	PLK1	-0.003588	0.000155	0.003105	0.001032	0.992589	0.000152	0.989001	0.0001	0.955083	0.001331	0.958188	0.000639
21	MARK4	-0.006496	9.4e-05	0.005235	0.000511	0.988104	0.000178	0.981608	0.000221	0.957957	0.000478	0.963192	0.00064
22	MARK1	-0.006514	0.000109	0.004939	0.000206	0.988097	0.000182	0.981583	0.000226	0.958234	0.000694	0.963174	0.000644
23	BRSK2	-0.006535	0.000131	0.004738	0.000117	0.988097	0.000101	0.981562	8.8e-05	0.958808	0.000532	0.963546	0.000581
24	TNNI3K	-0.009223	0.000239	0.002247	0.000702	0.976479	0.000123	0.967255	0.000134	0.918402	0.000702	0.920649	0.00099
Davis et al (2011)
Rank	Kinase	ΔJSD μ=200	ΔJSD μ=200 std	ΔJSD μ=700	ΔJSD μ=700 std	i=1 score μ=200	i=1 score μ=200 std	i>1 max score μ=200	i>1 max score μ=200 std	i=1 score μ=700	i=1 score μ=700 std	i>1 max score μ=700	i>1 max score μ=700 std
1	TLK1	0.006188	0.005262	0.00645	0.00509	0.482844	0.002353	0.489032	0.003074	0.404253	0.001954	0.410703	0.004115
2	FLT3(D835Y)	0.002727	0.000285	0.005686	0.000461	0.992347	0.000302	0.995073	9.5e-05	0.960801	0.00049	0.966488	0.000817
3	FLT3(D835H)	0.00583	0.000311	0.000296	0.000164	0.982036	0.00041	0.987866	0.000327	0.962083	0.000199	0.962379	0.000321
4	ABL1-nonphosphorylated	0.004162	0.000107	0.000321	0.000242	0.992997	0.000121	0.997159	0.000188	0.97861	0.00042	0.978931	0.000505
5	STK16	0.003714	0.00078	0.000257	0.000964	0.951122	0.000677	0.954836	0.000697	0.897854	0.000902	0.89811	0.001137
6	FLT3(ITD)	0.003733	0.000393	0.000134	0.000204	0.984214	0.000383	0.987947	0.00031	0.972932	0.0003	0.973066	0.000206
7	FLT3	0.002205	2.8e-05	0.000294	0.000269	0.992898	9.7e-05	0.995103	0.000117	0.979434	0.000308	0.979729	0.000178
8	FLT4	0.001307	0.000293	0.001148	0.000414	0.962066	0.00023	0.963373	0.000242	0.949232	0.000454	0.95038	0.000554
9	FLT3(N841I)	0.001426	0.000388	0.001015	0.000403	0.974744	0.000492	0.97617	0.000178	0.963508	0.000474	0.964522	0.000504
10	GAK	0.002319	0.000151	0.000109	0.000315	0.99141	7.8e-05	0.993729	8.1e-05	0.980753	0.00042	0.980862	0.000624
11	SLK	0.000362	0.000524	0.002036	0.00054	0.980806	0.000581	0.981168	0.000381	0.950614	0.000911	0.95265	0.000542
12	ROS1	0.001833	0.000178	0.000474	0.000781	0.964562	0.00038	0.966395	0.00032	0.932064	0.000409	0.932538	0.000951
13	ERBB4	3e-06	0.000109	0.00208	0.000193	0.992047	0.000191	0.99205	8.5e-05	0.982442	0.000212	0.984522	0.000326
14	FLT3(K663Q)	0.001851	0.000208	0.000192	0.000258	0.989927	0.000276	0.991778	0.000135	0.977095	0.000367	0.977287	0.000252
15	ABL1(F317L)-nonphosphorylated	0.001435	0.000176	0.000274	0.000237	0.993028	0.000124	0.994463	0.000205	0.970135	0.000453	0.970409	0.000538
16	DDR1	6.4e-05	3.2e-05	0.001066	0.000261	0.999923	2.4e-05	0.999987	1.2e-05	0.989571	0.000336	0.990637	0.000438
17	TLK2	-0.006738	0.000491	0.006173	0.002218	0.527017	0.000968	0.520279	0.000842	0.430783	0.001701	0.436956	0.001906
Klaeger et al (2017)
Rank	Kinase	ΔJSD μ=200	ΔJSD μ=200 std	ΔJSD μ=700	ΔJSD μ=700 std	i=1 score μ=200	i=1 score μ=200 std	i>1 max score μ=200	i>1 max score μ=200 std	i=1 score μ=700	i=1 score μ=700 std	i>1 max score μ=700	i>1 max score μ=700 std
1	EPHA5	0.002785	0.000893	0.000544	0.00054	0.953678	0.000488	0.956462	0.000974	0.920503	0.000402	0.921047	0.000742
2	CDK17	0.000724	6.5e-05	0.001855	0.00046	0.998674	4.2e-05	0.999398	5.1e-05	0.983101	0.000312	0.984956	0.00045
3	TYK2	0.00083	0.000251	0.001339	0.000377	0.959997	0.000245	0.960827	0.000206	0.93095	0.000269	0.932288	0.000469
4	PDPK1;PDPK2P	0.001601	0.000312	-8e-06	0.000341	0.960947	0.000597	0.962548	0.000312	0.958126	0.00033	0.958117	0.000155
5	PRKCD	0.001281	0.000365	9.4e-05	0.000147	0.983142	0.000286	0.984424	0.00018	0.975658	0.000194	0.975752	0.00015
6	PRKD2	0.001184	0.000401	0.00017	0.000433	0.963003	0.000783	0.964186	0.000431	0.934061	0.000297	0.934231	0.000591
Karaman et al (2008)
Rank	Kinase	ΔJSD μ=200	ΔJSD μ=200 std	ΔJSD μ=700	ΔJSD μ=700 std	i=1 score μ=200	i=1 score μ=200 std	i>1 max score μ=200	i>1 max score μ=200 std	i=1 score μ=700	i=1 score μ=700 std	i>1 max score μ=700	i>1 max score μ=700 std
1	SLK	0.001227	7.6e-05	0.002272	0.000278	0.978	6.2e-05	0.979227	5.7e-05	0.950441	0.000349	0.952713	0.000552
2	BIKE	0.00305	0.000753	9.9e-05	0.000764	0.88054	0.001205	0.883591	0.001391	0.807695	0.000846	0.807795	0.000659
3	VEGFR2	0.002386	0.000256	0.000708	0.000295	0.96262	0.000168	0.965006	0.000134	0.956567	0.000325	0.957274	0.000158
4	KIT(V559D,V654A)	0.000252	0.000237	0.002604	0.000343	0.976806	0.000317	0.977058	0.000262	0.963847	0.000248	0.96645	0.000386
5	JNK3	-0.00015	0.000469	0.001422	0.000504	0.95401	0.000374	0.953861	0.000532	0.930306	0.000399	0.931728	0.000424
6	FLT4	-8.8e-05	0.000104	0.001335	0.000387	0.94859	0.000151	0.948502	7.8e-05	0.934264	0.000492	0.935598	0.000524
