# Supplementary material for: Death by a thousand cuts through kinase inhibitor combinations that maximize selectivity and enable rational multitargeting
Source: eLife. 2023 Dec 4;12:e86189. doi: 10.7554/eLife.86189 (PMC10769483; doi:10.7554/eLife.86189)
Supplement: Figure 5—source data 1. — The cumulative activity each compound and the equimolar combination of compounds was studied via an 11-point in-cell NanoBRET target engagement assay for MAPK14 and the set of major off-targets defined by multicompound–multitarget scoring (MMS) analysis. The assay was performed in cellulo and using cell lysate. A conservative 50 µM cutoff was imposed for reporting all in cellulo EC50 values. The cumulative activity of the three compounds was calculated for each kinase using the same method as in the MMS protocol with the average EC50 of each compound for each kinase. The cumulative activity and cumulative EC50s for both the in cellulo and lysed mode experiments are indicated, along with the average observed EC50s. N/A indicates that a value could not be calculated due to an EC50 > 50 µM for one or more of the single inhibitors. [file elife-86189-fig5-data1.xlsx]

## Sheet: NanoBRET in cellulo
In cellulo
TPKI-108
	Rep1	Rep2	Rep3	Rep4	Rep5	Average	STD	SEM
MAPK14	1.726e-08	1.2e-07	1.798e-07	3.886e-08	5.28e-08	8.1744e-08	5.98556e-08	2.67682e-08
PKN1	4.002e-05	> 50 µM	> 50 µM	N/A	N/A	4.002e-05	N/A	N/A
RPS6KA1	> 50 µM	N/A	N/A	N/A	N/A	> 50 µM	N/A	N/A
RPS6KA6	4.439e-05	> 50 µM	> 50 µM	> 50 µM	> 50 µM	4.439e-05	N/A	N/A
MAPK11	8.001e-08	6.031e-08	9.348e-08	1.571e-07	2.2e-07	1.2218e-07	5.86823e-08	2.62435e-08
ABL1	> 50 µM	N/A	N/A	N/A	N/A	> 50 µM	N/A	N/A
BRAF	> 50 µM	N/A	N/A	N/A	N/A	> 50 µM	N/A	N/A
CAMK1	> 50 µM	4.346e-05	4.223e-05	> 50 µM	4.476e-05	4.34833e-05	1.033e-06	5.96403e-07
JAK1	> 50 µM	> 50 µM	> 50 µM	N/A	> 50 µM	> 50 µM	N/A	N/A
KIT	> 50 µM	N/A	N/A	N/A	N/A	> 50 µM	N/A	N/A
LRRK2	> 50 µM	> 50 µM	> 50 µM	N/A	> 50 µM	> 50 µM	N/A	N/A
PRKCQ	> 50 µM	N/A	N/A	N/A	N/A	> 50 µM	N/A	N/A
UNC10225285A
	Rep1	Rep2	Rep3	Rep4	Rep5	Average	STD	SEM
MAPK14	1.947e-07	1.367e-06	6.678e-06	3.16e-07	4.629e-07	1.80372e-06	2.47182e-06	1.10543e-06
PKN1	3.575e-05	> 50 µM	> 50 µM	N/A	> 50 µM	3.575e-05	N/A	N/A
RPS6KA1	> 50 µM	N/A	N/A	N/A	N/A	> 50 µM	N/A	N/A
RPS6KA6	2.303e-05	> 50 µM	3.961e-05	4.98e-05	3.233e-05	3.61925e-05	9.81088e-06	4.90544e-06
MAPK11	5.349e-07	1.415e-06	5.345e-07	1.713e-06	1.731e-06	1.18568e-06	5.43245e-07	2.42947e-07
ABL1	> 50 µM	N/A	N/A	N/A	N/A	> 50 µM	N/A	N/A
BRAF	> 50 µM	N/A	N/A	N/A	N/A	> 50 µM	N/A	N/A
CAMK1	> 50 µM	> 50 µM	3.237e-05	4.714e-05	3.548e-05	3.833e-05	6.35768e-06	3.67061e-06
JAK1	2.116e-05	> 50 µM	2.1e-05	3.688e-05	3.587e-05	2.87275e-05	7.65604e-06	3.82802e-06
KIT	> 50 µM	N/A	N/A	N/A	N/A	> 50 µM	N/A	N/A
LRRK2	7.268e-06	> 50 µM	> 50 µM	N/A	8.48e-06	7.874e-06	6.06e-07	4.28507e-07
PRKCQ	> 50 µM	N/A	N/A	N/A	N/A	> 50 µM	N/A	N/A
UNC10225404A
	Rep1	Rep2	Rep3	Rep4	Rep5	Average	STD	SEM
MAPK14	1.278e-06	8.896e-06	9.248e-06	1.97e-06	1.731e-06	4.6246e-06	3.63979e-06	1.62776e-06
PKN1	> 50 µM	> 50 µM	> 50 µM	N/A	N/A	> 50 µM	N/A	N/A
RPS6KA1	> 50 µM	N/A	N/A	N/A	N/A	> 50 µM	N/A	N/A
RPS6KA6	> 50 µM	> 50 µM	> 50 µM	> 50 µM	> 50 µM	> 50 µM	N/A	N/A
MAPK11	2.034e-06	1.483e-06	1.67e-06	3.644e-06	3.233e-06	2.4128e-06	8.65835e-07	3.87213e-07
ABL1	> 50 µM	N/A	N/A	N/A	N/A	> 50 µM	N/A	N/A
BRAF	> 50 µM	N/A	N/A	N/A	N/A	> 50 µM	N/A	N/A
CAMK1	> 50 µM	> 50 µM	4.565e-05	> 50 µM	> 50 µM	4.565e-05	N/A	N/A
JAK1	> 50 µM	4.638e-05	> 50 µM	> 50 µM	> 50 µM	4.638e-05	N/A	N/A
KIT	> 50 µM	N/A	N/A	N/A	N/A	> 50 µM	N/A	N/A
LRRK2	> 50 µM	> 50 µM	> 50 µM	N/A	4.48e-05	4.48e-05	N/A	N/A
PRKCQ	> 50 µM	N/A	N/A	N/A	N/A	> 50 µM	N/A	N/A
Combination
	Rep1	Rep2	Rep3	Rep4	Rep5	Average	STD	SEM
MAPK14	5.716e-08	3.988e-07	5.78e-07	7.208e-08	1.245e-07	2.46108e-07	2.06999e-07	9.25727e-08
PKN1	> 50 µM	> 50 µM	> 50 µM	N/A	N/A	> 50 µM	N/A	N/A
RPS6KA1	> 50 µM	N/A	N/A	N/A	N/A	> 50 µM	N/A	N/A
RPS6KA6	3.977e-05	> 50 µM	> 50 µM	> 50 µM	> 50 µM	3.977e-05	N/A	N/A
MAPK11	2.872e-07	3.415e-07	> 50 µM	6.572e-07	5.859e-07	4.6795e-07	1.56834e-07	7.84171e-08
ABL1	> 50 µM	N/A	N/A	N/A	N/A	> 50 µM	N/A	N/A
BRAF	> 50 µM	N/A	N/A	N/A	N/A	> 50 µM	N/A	N/A
CAMK1	8.729e-06	> 50 µM	2.657e-05	4.165e-05	3.307e-05	2.75048e-05	1.20878e-05	6.04392e-06
JAK1	> 50 µM	> 50 µM	> 50 µM	N/A	> 50 µM	> 50 µM	N/A	N/A
KIT	> 50 µM	N/A	N/A	N/A	N/A	> 50 µM	N/A	N/A
LRRK2	> 50 µM	> 50 µM	> 50 µM	> 50 µM	> 50 µM	> 50 µM	N/A	N/A
PRKCQ	> 50 µM	N/A	N/A	N/A	N/A	> 50 µM	N/A	N/A
STD = Standard Deviation
SEM = Standard Error of the Mean
N/A = No binding observed

## Sheet: NanoBRET lysed mode
Lysed mode
Replicate 1 lysed
	TPKI-108	UNC10225285A	UNC10225404A	Combination
LRRK2	N/A	N/A	N/A	N/A
MAPK14	4.237e-08	5.992e-07	2.446e-06	1.337e-07
JAK1	3.832e-05	5.169e-05	7.387e-05	6.511e-05
CAMK1	3.066e-05	8.483e-05	0.0001249	5.704e-05
PKN1	7.257e-05	N/A	N/A	0.00032
RPS6KA6	5.335e-05	0.0006002	0.0001189	0.0003856
MAPK11	1.043e-07	8.382e-07	4.047e-06	4.123e-07
Replicate 2 lysed
	TPKI-108	UNC10225285A	UNC10225404A	Combination
LRRK2	N/A	N/A	N/A	N/A
MAPK14	3.139e-08	2.626e-07	1.787e-06	8.962e-08
JAK1	8.493e-05	9.229e-05	0.0001084	7.595e-05
CAMK1	2.613e-05	4.495e-05	9.118e-05	2.87e-05
PKN1	2.06e-05	2.274e-05	0.0009488	2.179e-05
RPS6KA6	0.0001516	0.0004506	0.05076	0.0003531
MAPK11	9.032e-08	5.661e-07	3.405e-06	3.019e-07
Average lysed
	TPKI-108	UNC10225285A	UNC10225404A	Combination
LRRK2	N/A	N/A	N/A	N/A
MAPK14	3.688e-08	4.309e-07	2.1165e-06	1.1166e-07
JAK1	6.1625e-05	7.199e-05	9.1135e-05	7.053e-05
CAMK1	2.8395e-05	6.489e-05	0.00010804	4.287e-05
PKN1	4.6585e-05	2.274e-05	0.0009488	0.000170895
RPS6KA6	0.000102475	0.0005254	0.0254394	0.00036935
MAPK11	9.731e-08	7.0215e-07	3.726e-06	3.571e-07
STD lysed
	TPKI-108	UNC10225285A	UNC10225404A	Combination
LRRK2	N/A	N/A	N/A	N/A
MAPK14	5.49e-09	1.683e-07	3.295e-07	2.204e-08
JAK1	2.3305e-05	2.03e-05	1.7265e-05	5.42e-06
CAMK1	2.265e-06	1.994e-05	1.686e-05	1.417e-05
PKN1	2.5985e-05	N/A	N/A	0.000149105
RPS6KA6	4.9125e-05	7.48e-05	0.0253205	1.625e-05
MAPK11	6.99e-09	1.3605e-07	3.21e-07	5.52e-08
STD = Standard Deviation
N/A = No binding observed

## Sheet: Combination EC50 Predictions
	In cellulo	Combination Activity at 1 µM (calculated)	Combination EC50 (calculated)	Combination EC50 (observed)
	MAPK14	81.2546	2.30699e-07	2.46108e-07
	PKN1	N/A	N/A	> 50 µM
	RPS6KA6	N/A	N/A	3.977e-05
	MAPK11	75.8891	3.17712e-07	4.6795e-07
	CAMK1	2.31171	4.22581e-05	2.75048e-05
	JAK1	N/A	N/A	> 50 µM
	LRRK2	N/A	N/A	> 50 µM
	Lysed mode	Combination Activity at 1 µM (calculated)	Combination EC50 (calculated)	Combination EC50 (observed)
	MAPK14	90.8837	1.00307e-07	1.1166e-07
	PKN1	2.16845	4.51159e-05	0.000170895
	RPS6KA6	0.388521	0.000256386	0.00036935
	MAPK11	79.9586	2.50647e-07	3.571e-07
	CAMK1	1.95707	5.00969e-05	4.287e-05
	JAK1	1.35118	7.30092e-05	7.053e-05
	PKN1	2.16845	4.51159e-05	0.000170895
	N/A = a value could not be calculated due to EC50s > 50 µM for one or more of the single inhibitors
