# Supplementary material for: Death by a thousand cuts through kinase inhibitor combinations that maximize selectivity and enable rational multitargeting
Source: eLife. 2023 Dec 4;12:e86189. doi: 10.7554/eLife.86189 (PMC10769483; doi:10.7554/eLife.86189)
Supplement: Figure 6—source data 1. — The selectivity of Mixtures A and B are compared to the most selective single inhibitor that is sufficiently potent (Kd < 111 nM at all targets) for each respective target set. Fold-selectivity is the potency at an off-target divided by the potency of the least potently inhibited on-target of a given compound or mixture. Fold-selectivity advantage is the fold-selectivity of each mixture divided by the fold-selectivity of the corresponding most selective single compound at a particular off-target. For example, Mixture A is 22.97-fold more selective for FYN than BMX, while dasatinib is only 1.77-fold more selective for FYN than BMX, yielding a fold-selectivity advantage of 12.96 for Mixture A versus dasatinib at this off-target kinase. A total of 22 kinases were considered for validating each mixture; 4 on-target kinases and 18 off-target kinases for Mixture A, and 2 on-target kinases and 20 off-target kinases for Mixture B. [file elife-86189-fig6-data1.xlsx]

## Sheet: DiscoverX KdELECT Analyses
		Kinase	Dasatinib Kd (nM) (Davis et al 2011)	Mixture A Kd (nM) (this study)	Dasatinib fold-selectivity versus FYN	Mixture A fold-selectivity versus FYN	Mixture A fold-selectivity advantage
Targets	1	ABL1(F317L)-nonphosphorylated	0.032	4.6
	2	ABL1(F317L)-phosphorylated	0.019	16
	3	FYN	0.79	74
	4	LYN	0.57	40
Off-Targets	1	BMX	1.4	1700	1.77215	22.973	12.9633
	2	BTK	1.4	4900	1.77215	66.2162	37.3649
	3	CSK	1	3300	1.26582	44.5946	35.2297
	4	EPHA2	0.85	960	1.07595	12.973	12.0572
	5	EPHA4	1.2	660	1.51899	8.91892	5.87162
	6	EPHA5	0.24	3200	0.303797	43.2432	142.342
	7	EPHA8	0.24	650	0.303797	8.78378	28.9133
	8	EPHB1	0.45	1900	0.56962	25.6757	45.0751
	9	EPHB2	0.39	1800	0.493671	24.3243	49.2723
	10	EPHB3	6.9	13000	8.73418	175.676	20.1136
	11	EPHB4	0.34	1200	0.43038	16.2162	37.6789
	12	GAK	2.6	600	3.29114	8.10811	2.46362
	13	HCK	0.35	380	0.443038	5.13514	11.5907
	14	MEK5	3.3	7900	4.17722	106.757	25.5569
	15	SIK2	6.4	6500	8.10127	87.8378	10.8425
	16	TNK2	5.6	3500	7.08861	47.2973	6.6723
	17	TXK	2.1	4500	2.65823	60.8108	22.8764
	18	YES	0.3	290	0.379747	3.91892	10.3198
							average: 28.73
		Kinase	AST-487 Kd (nM) (Davis et al 2011)	Mixture B Kd (nM) (this study)	AST-487 fold-selectivity versus TRKC	Mixture B fold-selectivity versus CDC2L5	Mixture B fold-selectivity advantage
Targets	1	CDC2L5	0.94	30
	2	TRKC	34	27
Off-Targets	1	ABL1-phosphorylated	13	110	0.382353	3.66667	9.58974
	2	ABL2	3.4	160	0.1	5.33333	53.3333
	3	CDKL1	13	4500	0.382353	150	392.308
	4	CDKL2	0.52	61	0.0152941	2.03333	132.949
	5	CDKL3	3.9	480	0.114706	16	139.487
	6	CDKL5	6.6	5800	0.194118	193.333	995.96
	7	HIPK2	7.3	1300	0.214706	43.3333	201.826
	8	IKK-alpha	41	7900	1.20588	263.333	218.374
	9	LYN	14	75	0.411765	2.5	6.07143
	10	MAP4K4	15	1300	0.441176	43.3333	98.2222
	11	MINK	7.8	3900	0.229412	130	566.667
	12	MKK7	27	4900	0.794118	163.333	205.679
	13	MKNK1	26	640	0.764706	21.3333	27.8974
	14	MYO3A	41	880	1.20588	29.3333	24.3252
	15	p38-delta	13	220	0.382353	7.33333	19.1795
	16	PCTK2	15	620	0.441176	20.6667	46.8444
	17	PFTK1	17	160	0.5	5.33333	10.6667
	18	STK35	16	1800	0.470588	60	127.5
	19	TAK1	1.5	65	0.0441176	2.16667	49.1111
	20	ZAK	2.3	170	0.0676471	5.66667	83.7681
							average: 170.49
The selectivity of Mixture A and Mixture B are compared to the most selective single inhibitor that is sufficiently potent (Kd < 111 nM at all targets)
Fold-selectivity is the potency at an off-target divided by the potency of the least potently inhibited on-target of a given compound or mixture.
For example, Mixture B has a fold-selectivity of 3.67 against ABL1-phos (110 nM / 30 nM) while AST-487 has a fold selectivity of 0.38 against ABL1-phos (13 nM / 34 nM)
Fold-selectivity advantage is the fold-selectivity of each mixture divided by the fold-selectivity of the corresponding most selective single compound at a particular off-target.
For example, Mixture A is 22.97-fold more selective for FYN than BMX, while dasatinib is only 1.77-fold more selective for FYN than BMX, yielding a fold-selectivity advantage of 12.96 for Mixture A versus dasatinib at this off-target kinase.
