# Supplementary material for: Death by a thousand cuts through kinase inhibitor combinations that maximize selectivity and enable rational multitargeting
Source: eLife journal article supplement (doi:10.7554/elife.86189), 2023-12-04
Supplement: supp [file elife-86189-supp-v1.zip]

**A**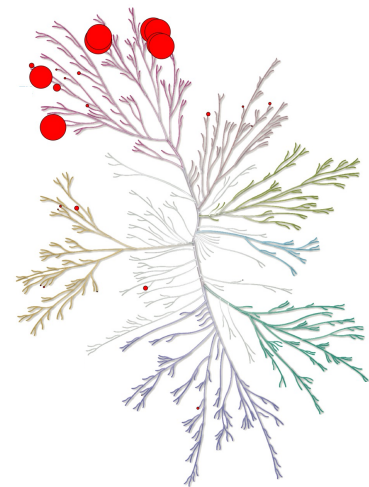

Imatinib Target: ABL1-phosphorylated  
 JSD score = 0.959  
 Imatinib  $K_d$  = 21 nM (Davis *et al*)  
 [Imatinib] = 189 nM

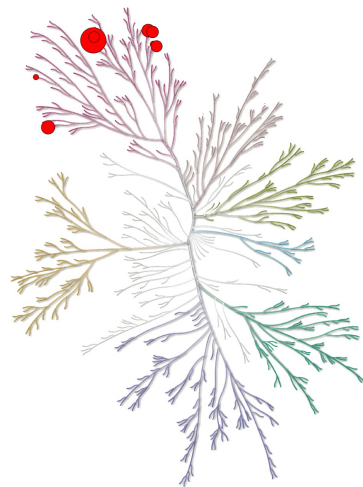

Imatinib Target: ABL1-nonphosphorylated  
 JSD score = 0.980  
 Imatinib  $K_d$  = 1.1 nM (Davis *et al*)  
 [Imatinib] = 9.9 nM

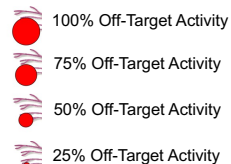**B**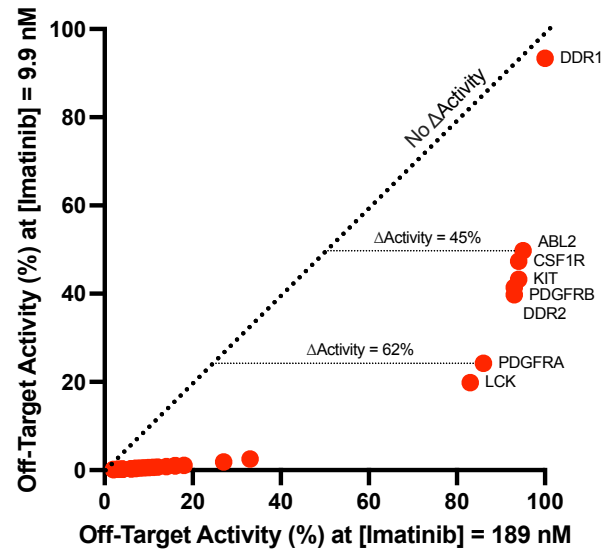

Figure 2 Figure Supplement 3
