# Supplementary figures and images for: Death by a thousand cuts through kinase inhibitor combinations that maximize selectivity and enable rational multitargeting
Source: eLife journal article supplement (doi:10.7554/elife.86189), 2023-12-04

**A**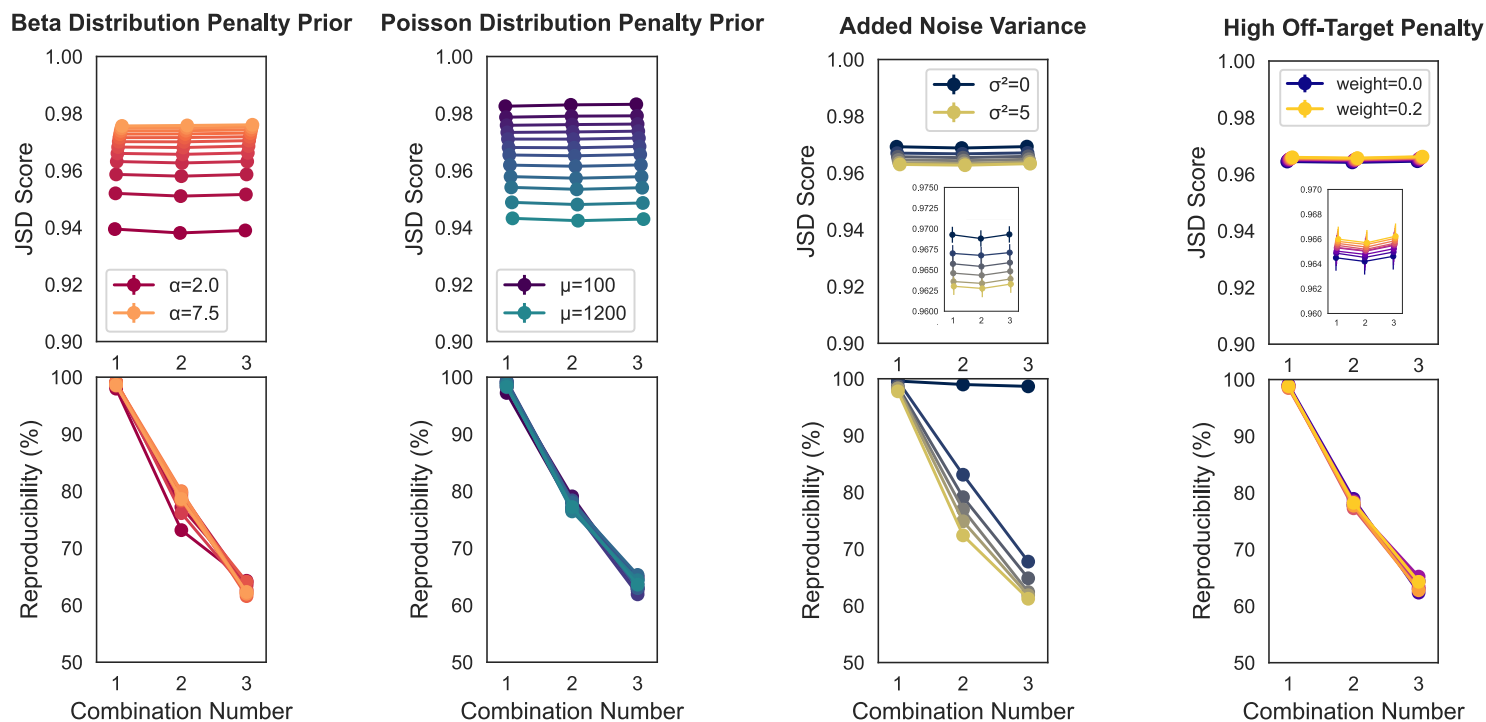**B**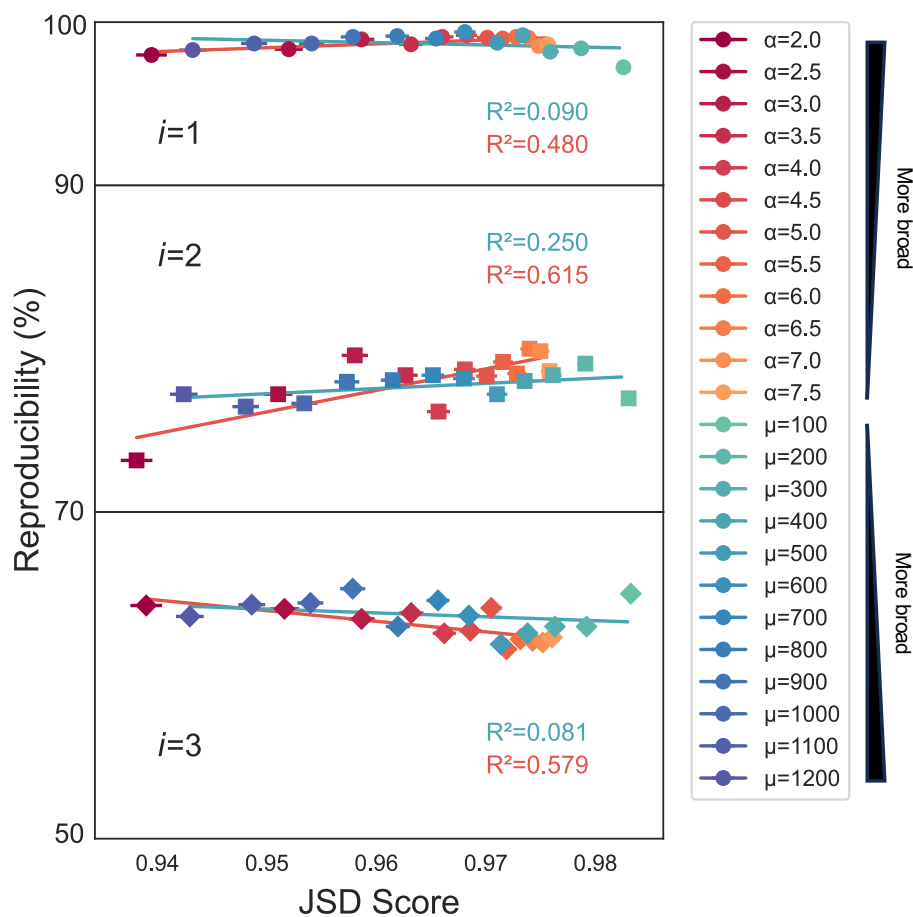**C**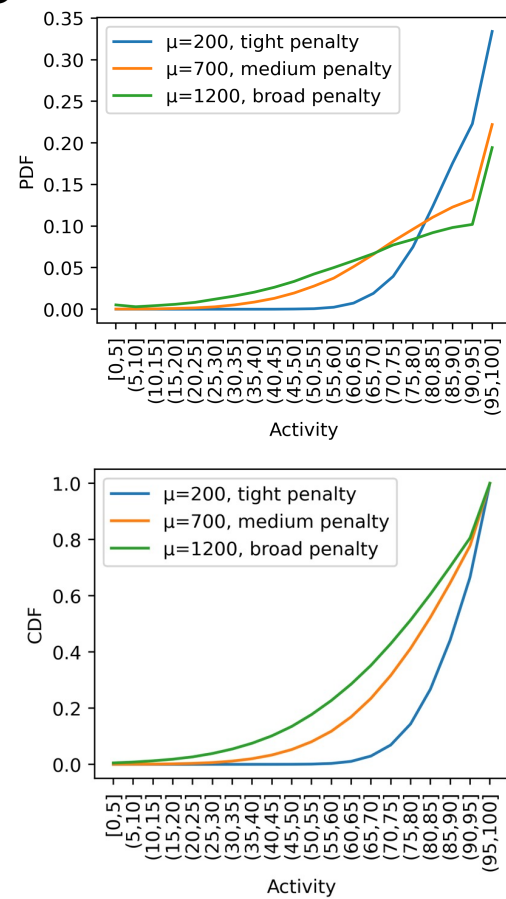

Figure 2 Figure Supplement 1

Supplement: supp [file elife-86189-supp-v1.zip]

**A**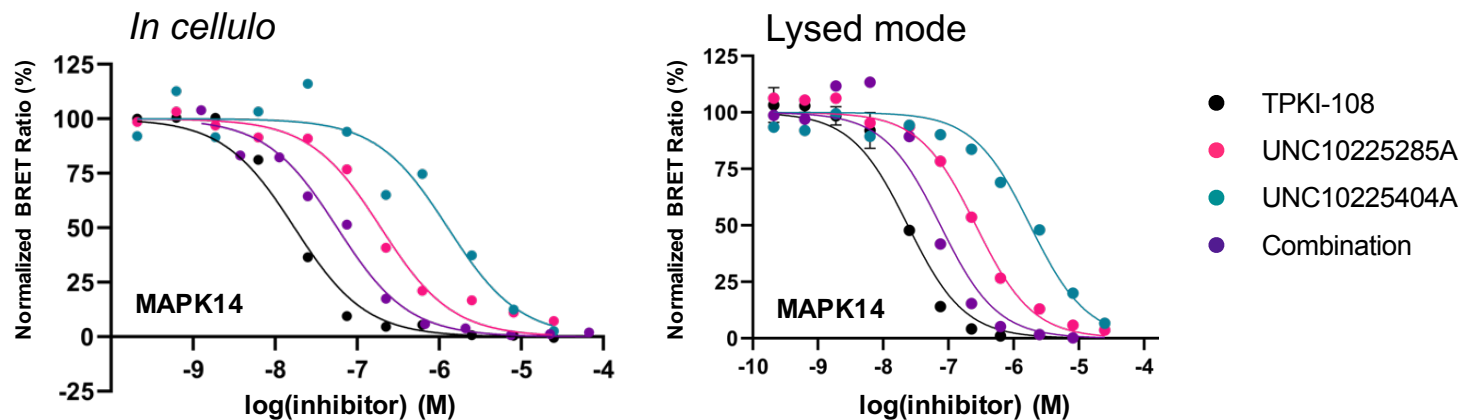**B**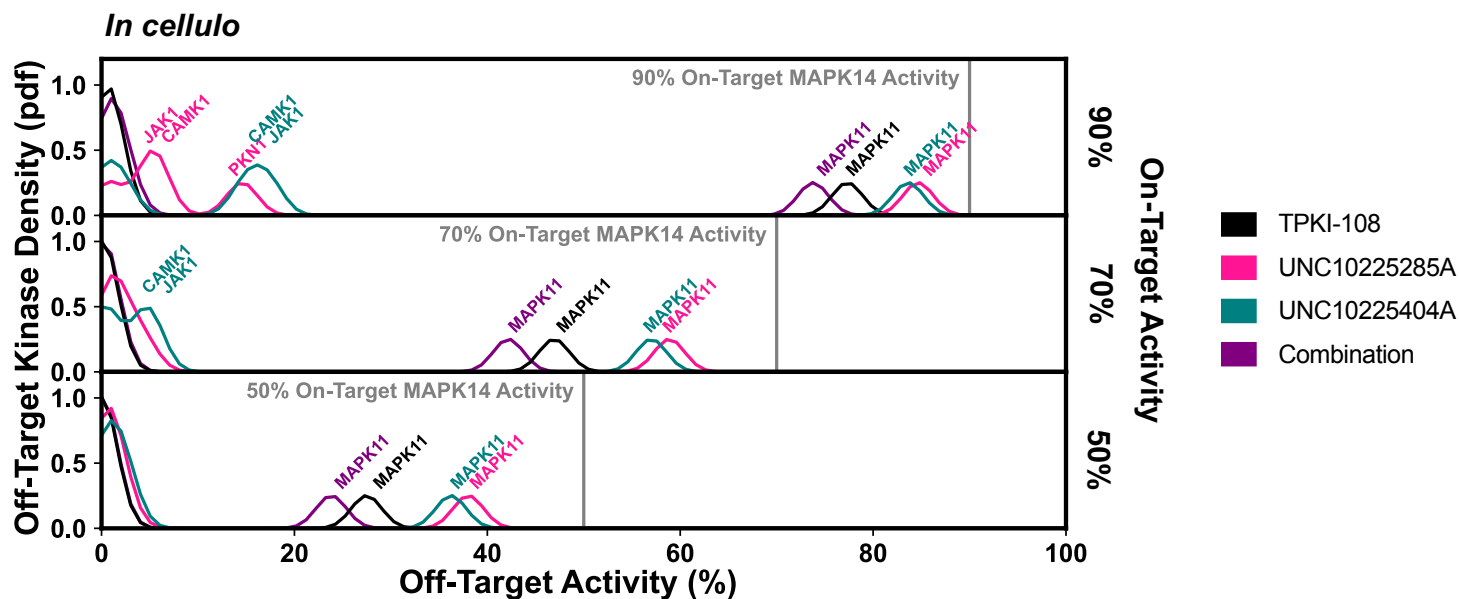

Figure 5 Figure Supplement 1

Supplement: supp [file elife-86189-supp-v1.zip]

**A**

Kinases targets with significant improvement (n=4)

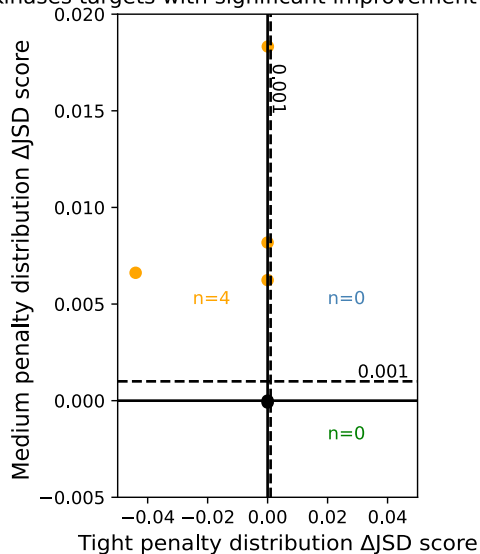**B**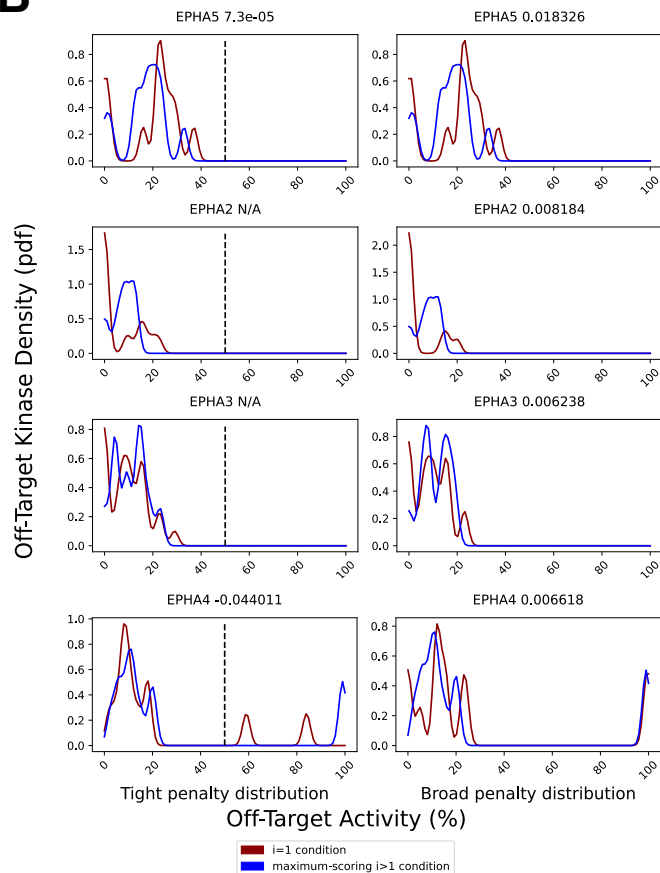

Figure 4 Figure Supplement 1

Supplement: supp [file elife-86189-supp-v1.zip]

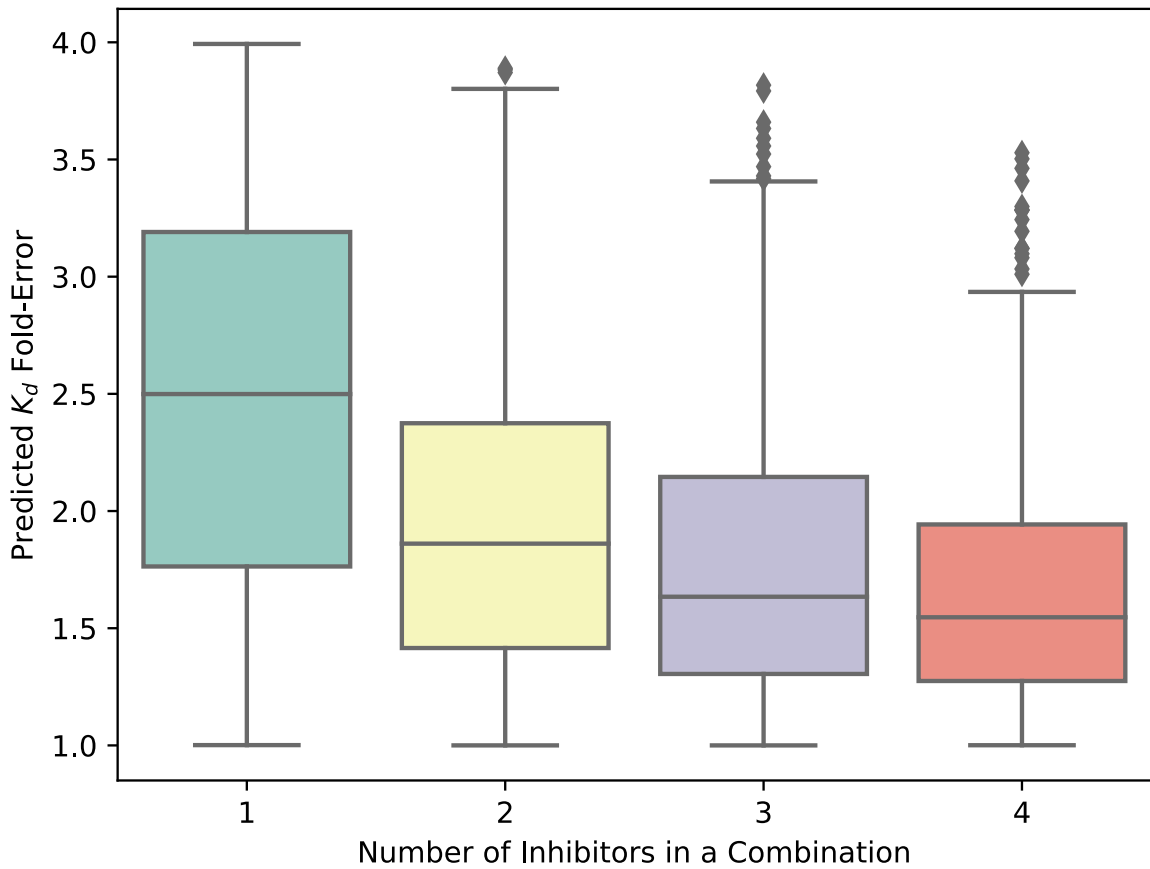

Figure 6 Figure Supplement 1

Supplement: supp [file elife-86189-supp-v1.zip]

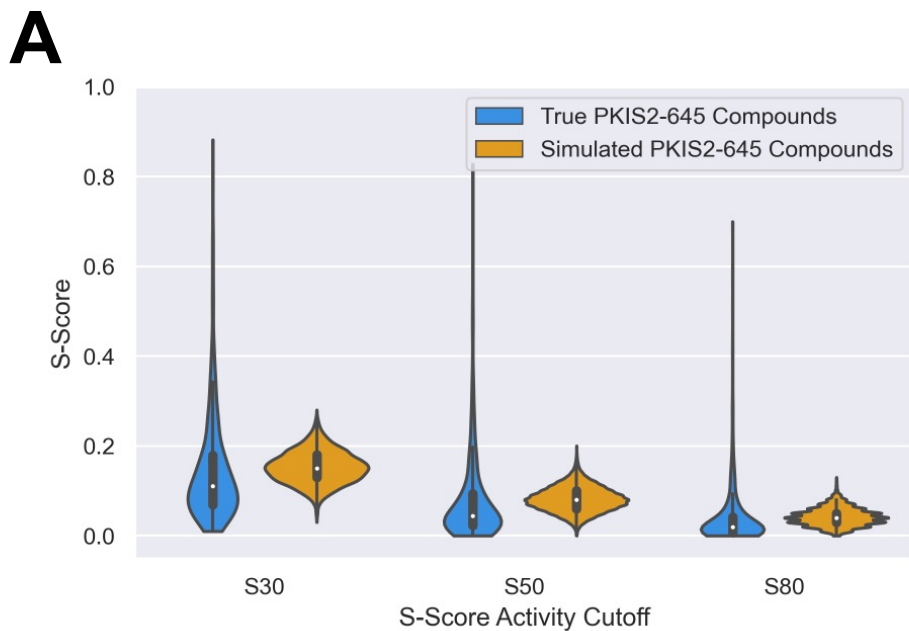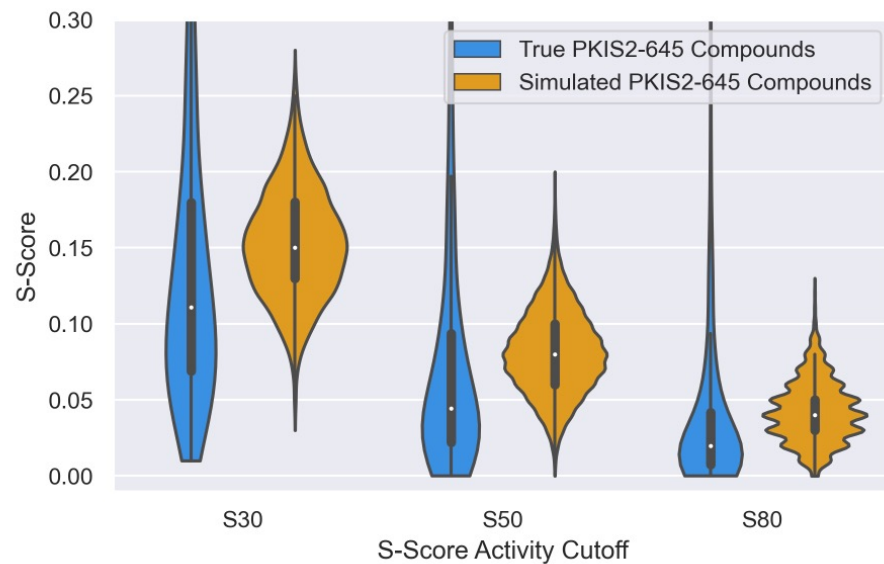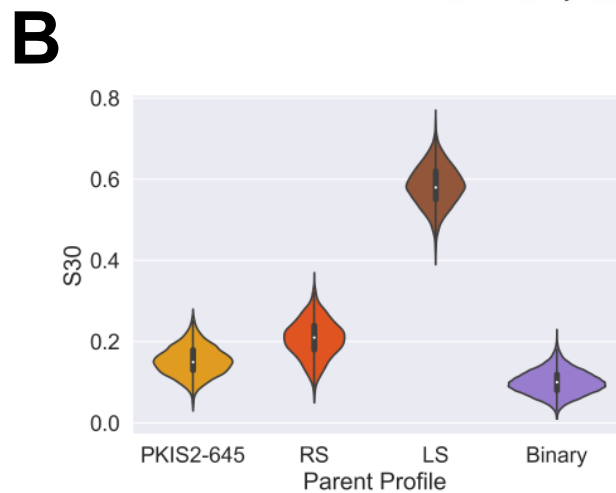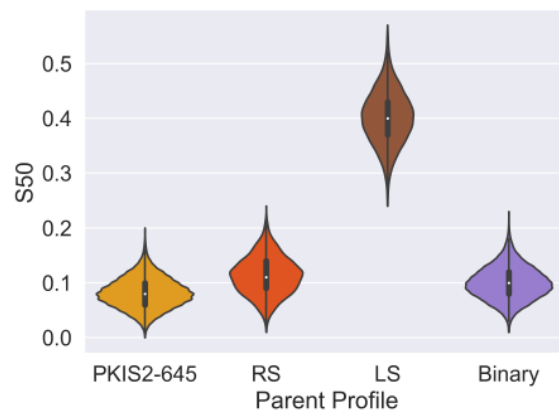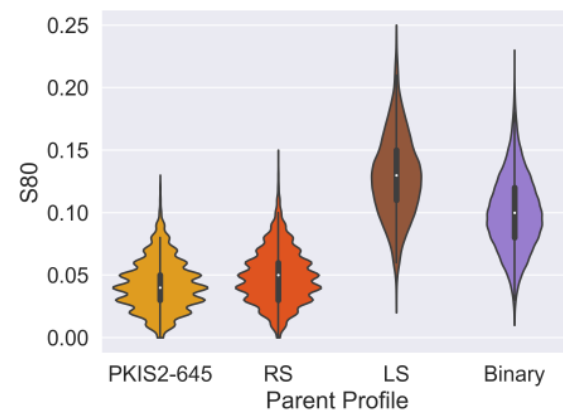

Figure 3 Figure Supplement 1

Supplement: supp [file elife-86189-supp-v1.zip]

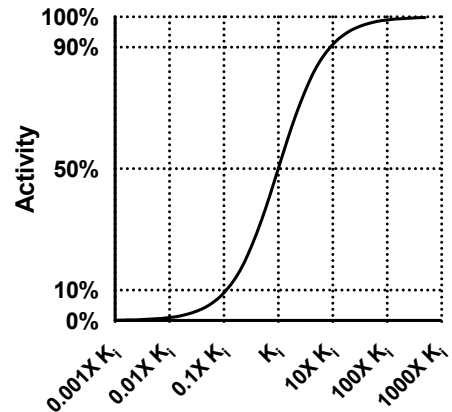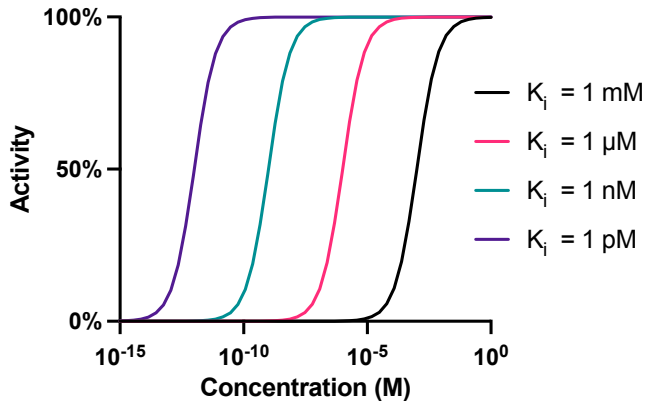

Figure 1 Figure Supplement 1

Supplement: supp [file elife-86189-supp-v1.zip]

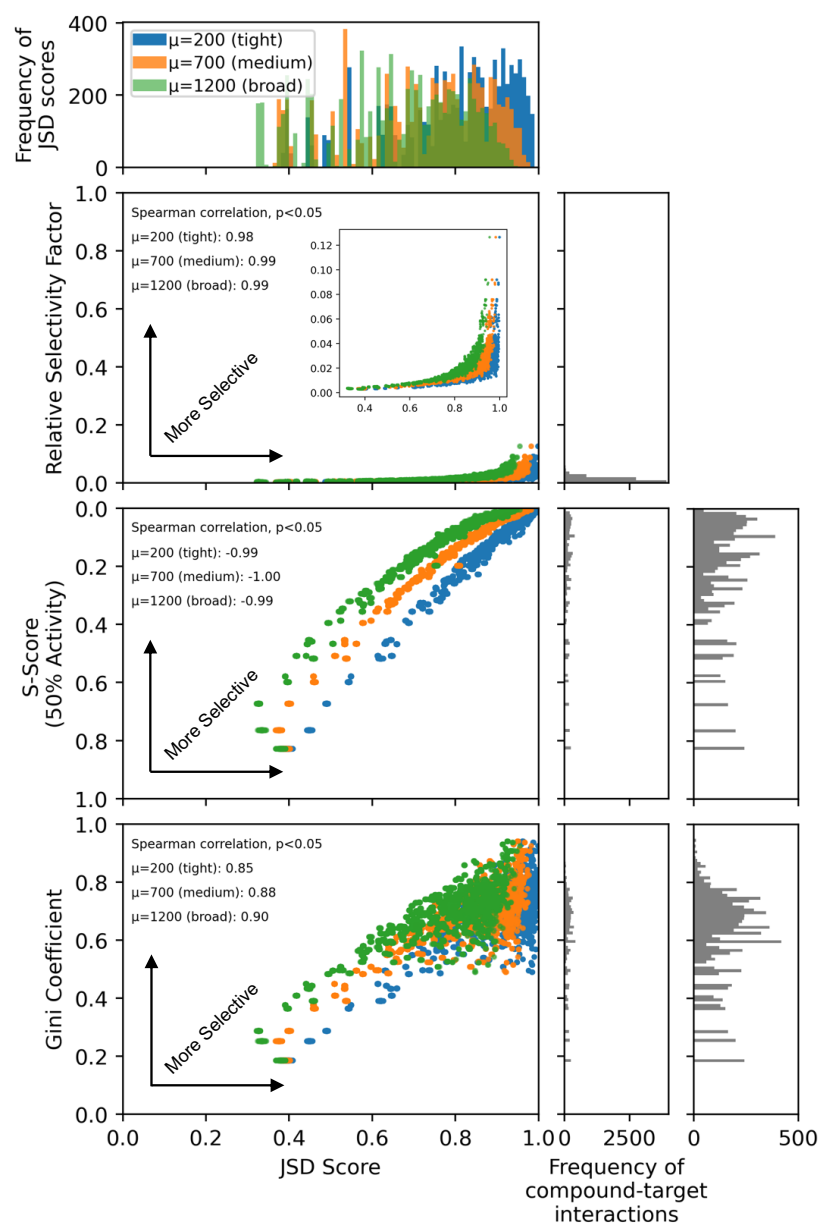

PKIS2-645 Drewry *et al* (2017)

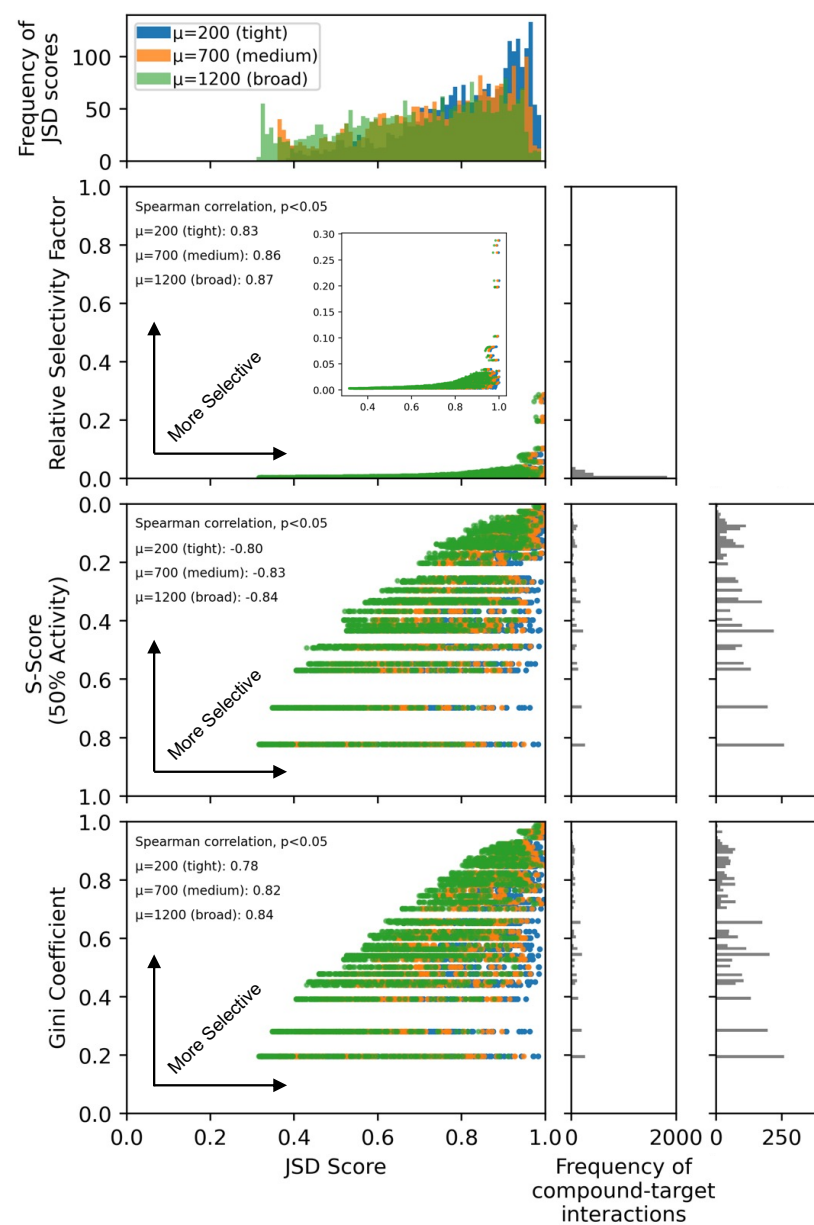

Davis *et al* (2011)

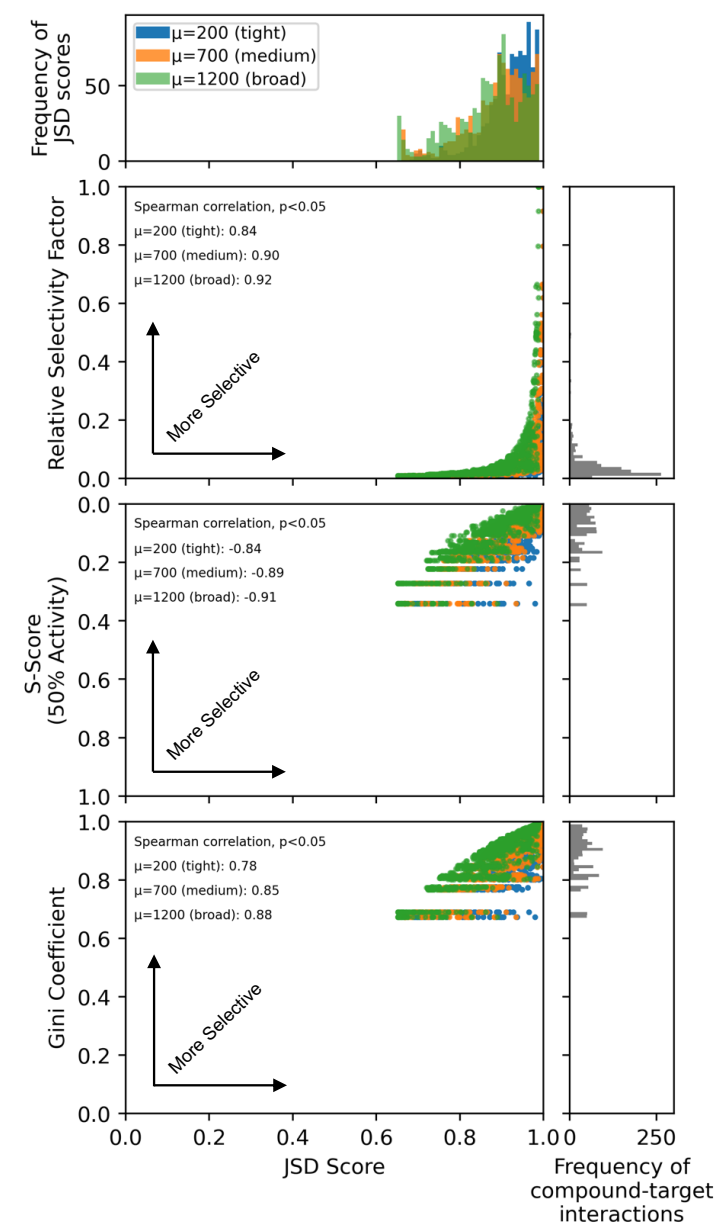

Klaeger *et al* (2017)

Supplement: supp [file elife-86189-supp-v1.zip]
